# Supplementary material for: Release of TGF-β3 from Surface-Modified PCL Fiber Mats Triggers a Dose-Dependent Chondrogenic Differentiation of Human Mesenchymal Stromal Cells
Source: MDPI journal article supplement (doi:10.3390/pharmaceutics15041303), 2023-04-21
Supplement: s1 [file s1]

---

## Supporting Information

**Article:** Release of TGF- $\beta_3$  from surface-modified PCL fiber mats triggers a dose-dependent chondrogenic differentiation of human mesenchymal stromal cells

Leonie Berten-Schunk<sup>1</sup>, Yvonne Roger<sup>2,3</sup>, Heike Bunjes<sup>1,4</sup>, Andrea Hoffmann<sup>2,3\*</sup>

<sup>1</sup> Technische Universität Braunschweig, Institut für Pharmazeutische Technologie und Biopharmazie, 38106 Braunschweig, Germany

<sup>2</sup> Hannover Medical School, Department of Orthopedic Surgery, Graded Implants and Regenerative Strategies, Laboratory of Biomechanics and Biomaterials, 30625 Hannover, Germany

<sup>3</sup> Niedersächsisches Zentrum für Biomedizinische Implantatforschung und Entwicklung (NIFE), 30625 Hannover, Germany

<sup>4</sup> Technische Universität Braunschweig, Zentrum für Pharmaverfahrenstechnik (PVZ), 38106 Braunschweig, Germany

Leonie Berten-Schunk and Yvonne Roger contributed equally to this paper.

\* Correspondence: heike.bunjes@tu-braunschweig.de, Hoffmann.Andrea@mh-hannover.de

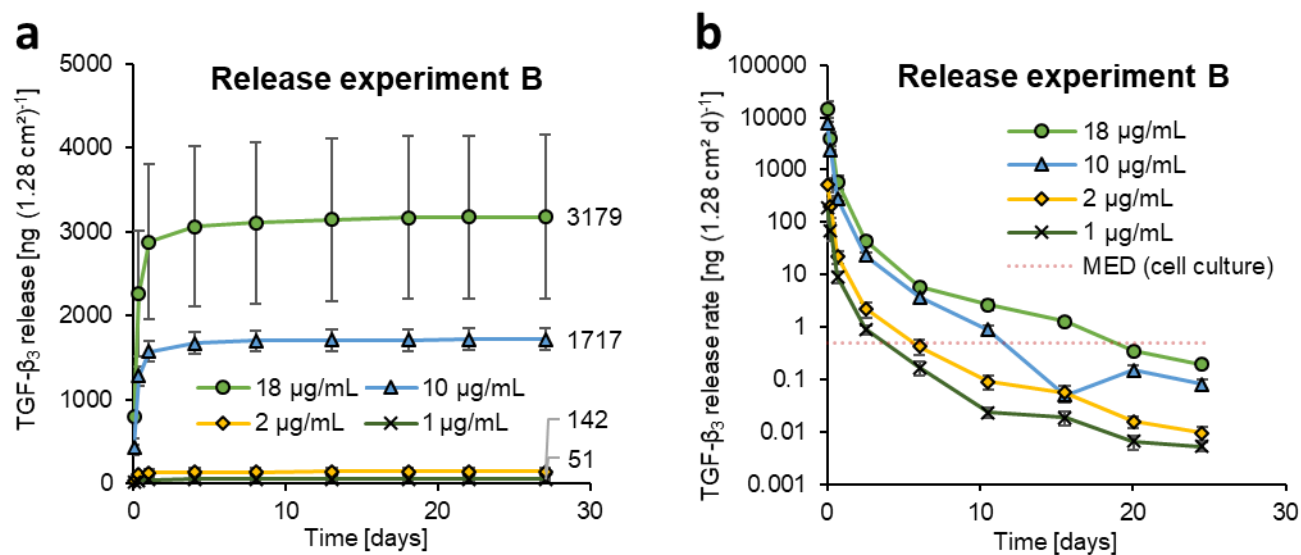

**Figure S 1** Cumulative release (a) and release rate (b) of TGF- $\beta_3$  from fiber mats (1.28 cm<sup>2</sup>) loaded with various protein concentrations in a repetitive experiment (“release experiment B”).

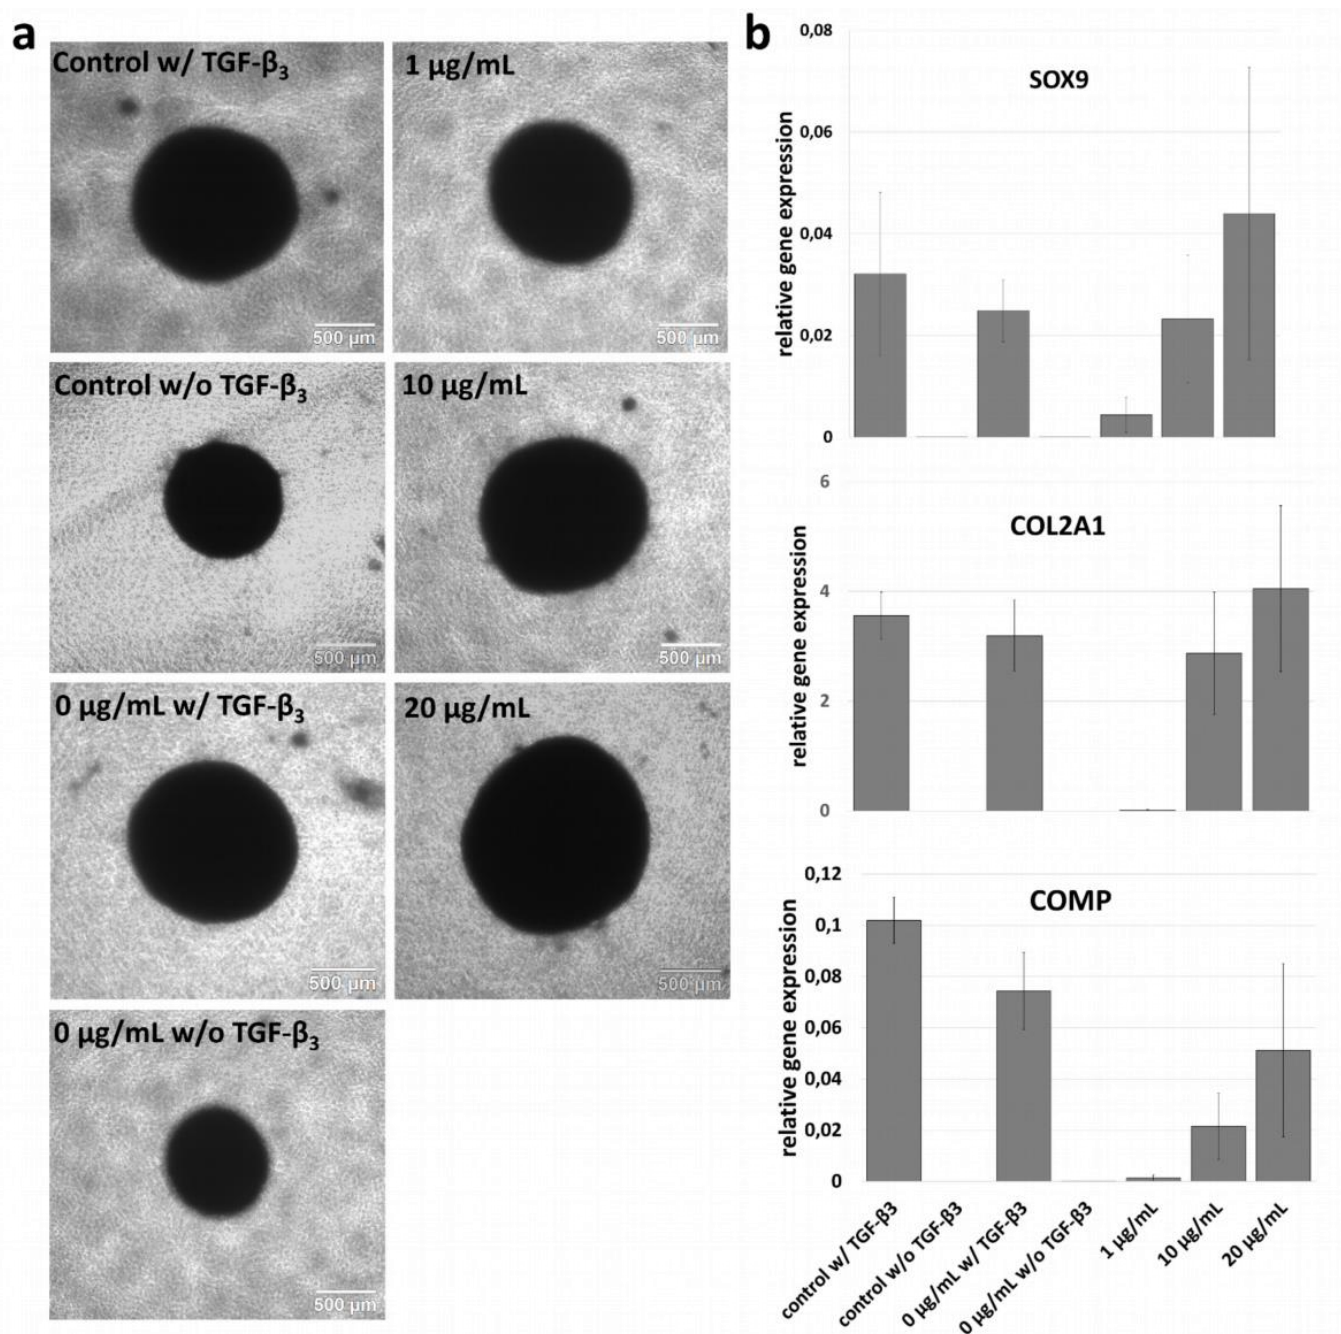

**Figure S 2** Chondrogenic differentiation of MSCs from donor B increases with increasing loading concentration. (a) shows chondrogenic cell pellets. In the presence of TGF-β<sub>3</sub> (0 μg/mL w/ TGF-β<sub>3</sub> (a fiber mat without TGF-β<sub>3</sub> loading but external addition of TGF-β<sub>3</sub>), 1 μg/mL, 10 μg/mL, 20 μg/mL) the morphology of the pellet is round, compact and the size increases with increasing loading concentration. In contrast, without TGF-β<sub>3</sub> the pellet shows considerably less compact growth and size. Scale bar: 500 μm. (b) demonstrates the gene expression analysis of the chondrogenic marker genes *SOX9*, *COL2A1* and *COMP* (relative gene expression). All three chondrogenic marker genes show an increase upon treatment with TGF-β<sub>3</sub> and almost no expression without TGF-β<sub>3</sub> treatment.

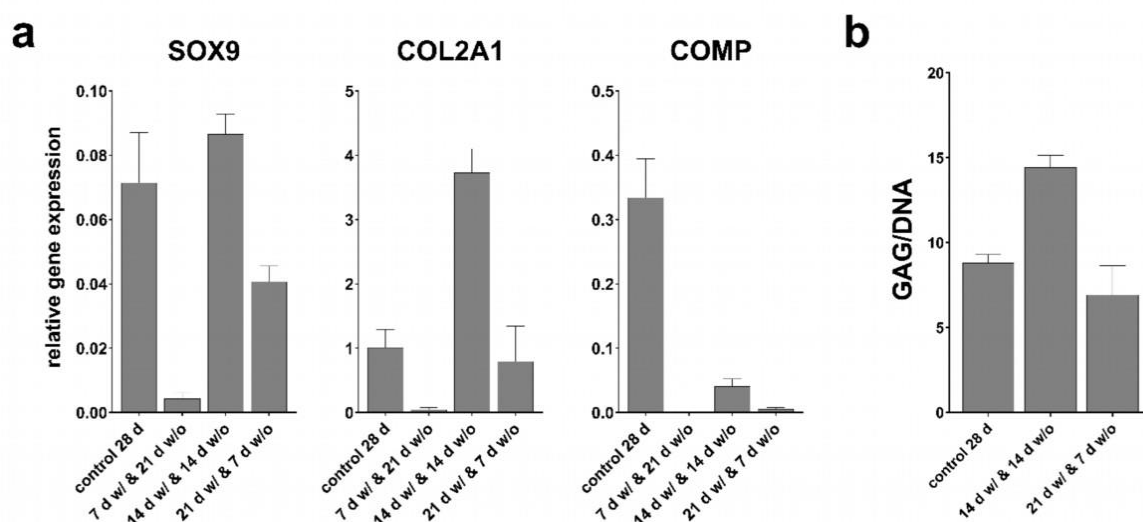

**Figure S 3** Chondrogenic differentiation after addition of TGF- $\beta_3$  (5 ng/mL) over specific periods. (a) Relative gene expression analysis is shown for *SOX9*, *COL2A1* and *COMP* after the addition of TGF- $\beta_3$  over 28 days (control 28 d), 7 days and further incubation of 21 days without TGF- $\beta_3$  (7 d w/ & 21 d w/o), 14 days and further incubation of 14 days (14 d w/ & 14 d w/o) and 21 days and 7 days without TGF- $\beta_3$  (21 d w/ & 7 d w/o). All three chondrogenic marker genes show an increase with the increasing incubation time of TGF- $\beta_3$ , with showing the lowest expression for 7 d w/ & 21 d w/o. (b) GAG/DNA ratio showing highest ratio for 14 days of TGF- $\beta_3$  incubation and further 14 days without TGF- $\beta_3$  incubation (14 d w/ & 14 d w/o).
